# Supplementary material for: Prognostic value of radiomics-based hyperdense middle cerebral artery sign for patients with acute ischemic stroke after thrombectomy strategy
Source: PubMed Central journal article supplement (PMC9880054; doi:10.3389/fneur.2022.1037204), 2023-01-13
Supplement: Data_Sheet_1.pdf [file Data_Sheet_1.pdf]

## *Supplementary Material*

### Prognostic value of Radiomics-Based Hyperdense Middle Cerebral Artery Sign for Patients with Acute Ischemic Stroke after Thrombectomy Strategy

Linna Li<sup>1</sup>, Mingyang Li<sup>1</sup>, Zhongping Chen<sup>1</sup>, Fei Lu<sup>1</sup>, Min Zhao<sup>2</sup>, Huimao Zhang<sup>1</sup>, Dan Tong<sup>1\*</sup>

<sup>1</sup> Department of Radiology, The First Hospital of Jilin University, Changchun, Jilin, 130021, China

<sup>2</sup> Pharmaceutical Diagnostics, GE Healthcare, Beijing, 100176, China

\* **Correspondence:** Dan Tong Email :tongdan@jlu.edu.cn

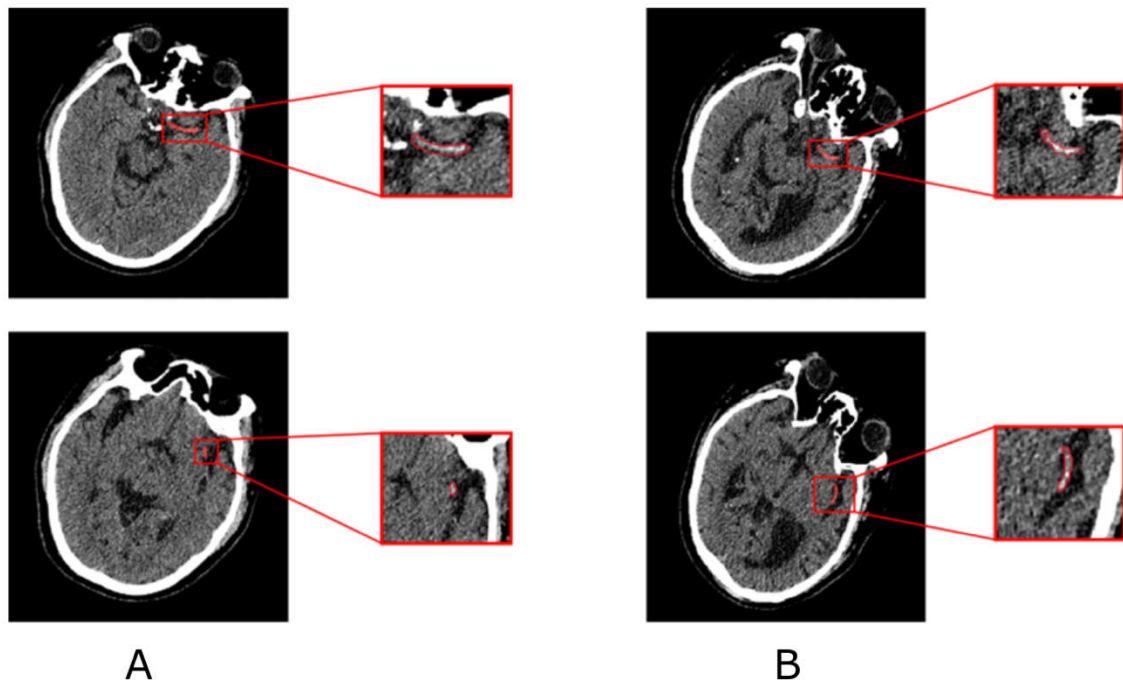

**Supplementary Figure 1.** (A) An example of patient with a good prognosis. (B) An example of the patient with a bad prognosis.

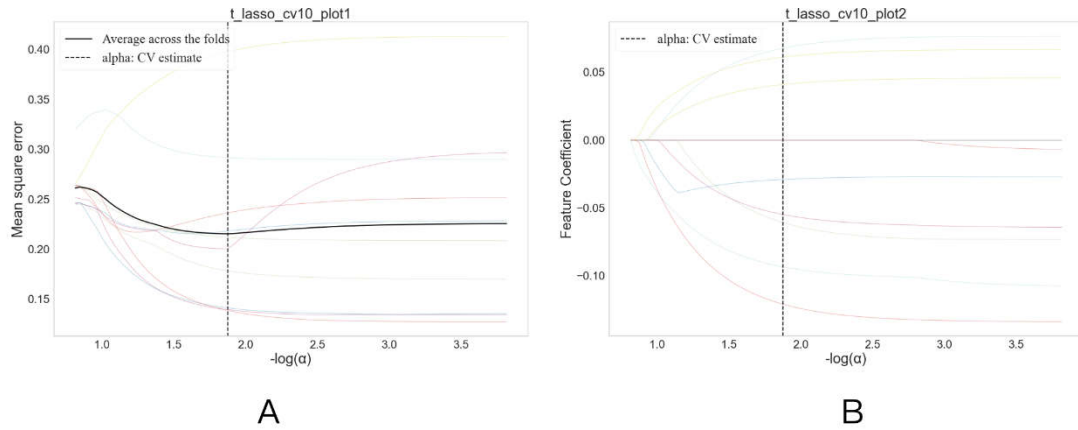

**Supplementary Figure 2.** (A) The relationship between the mean square of the LASSO 10-fold cross-validation and the value of  $-\log(\alpha)$ . The thick solid line is the mean LASSO 10-fold cross-validation curve and the dotted line is the LASSO regularized curve. (B) The relationship between the feature coefficient and the value of  $-\log(\alpha)$ . The thin dotted line is the feature coefficient value of each fold at different  $-\log(\alpha)$  values. The thick dotted line is the value of  $-\log(\alpha)$  at the minimum mean square error.

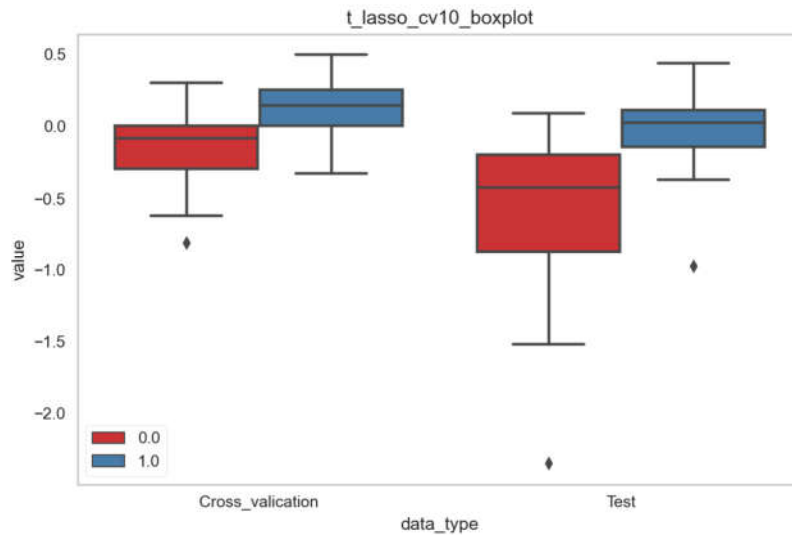

**Supplementary Figure 3.** Box plot of the fusion RF (named Lasso-score) on the cross-validation and test sets. A label of 0 indicates good prognosis, while a label of 1 indicates bad prognosis.

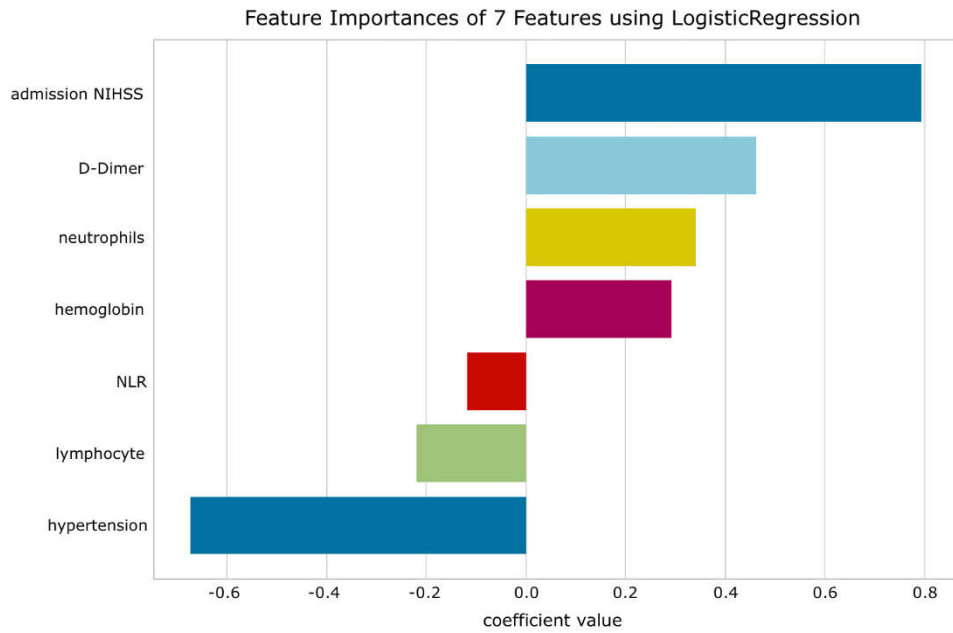

**Supplementary Figure 4.** The importance of CFs pre-MT for 90-day prognosis analyzed by logistic regression.

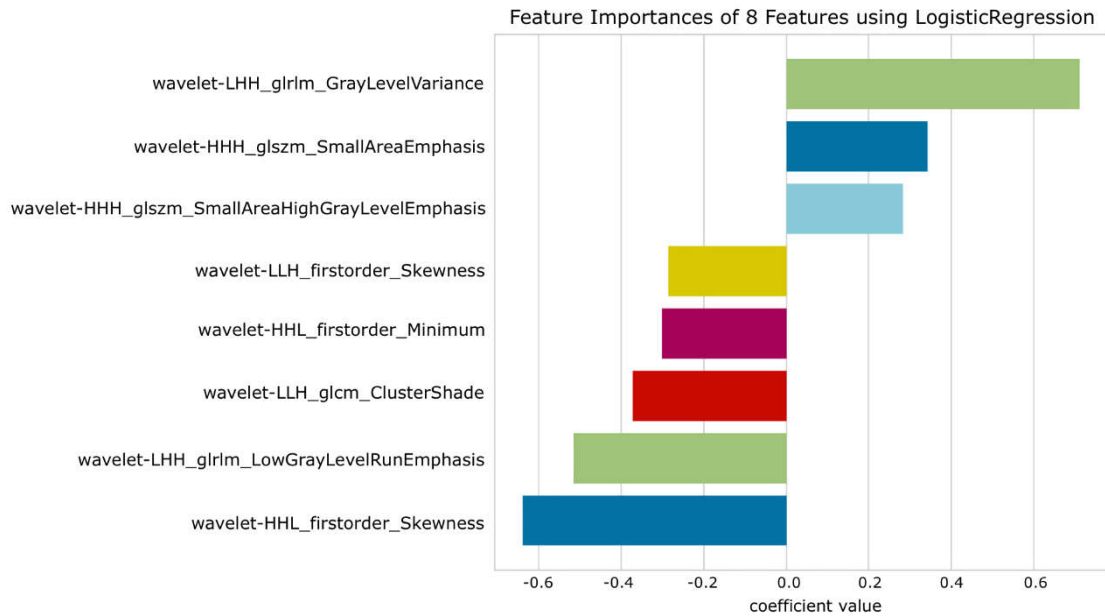

**Supplementary Figure 5.** The importance of RFs for 90-day prognosis analyzed by logistic regression.

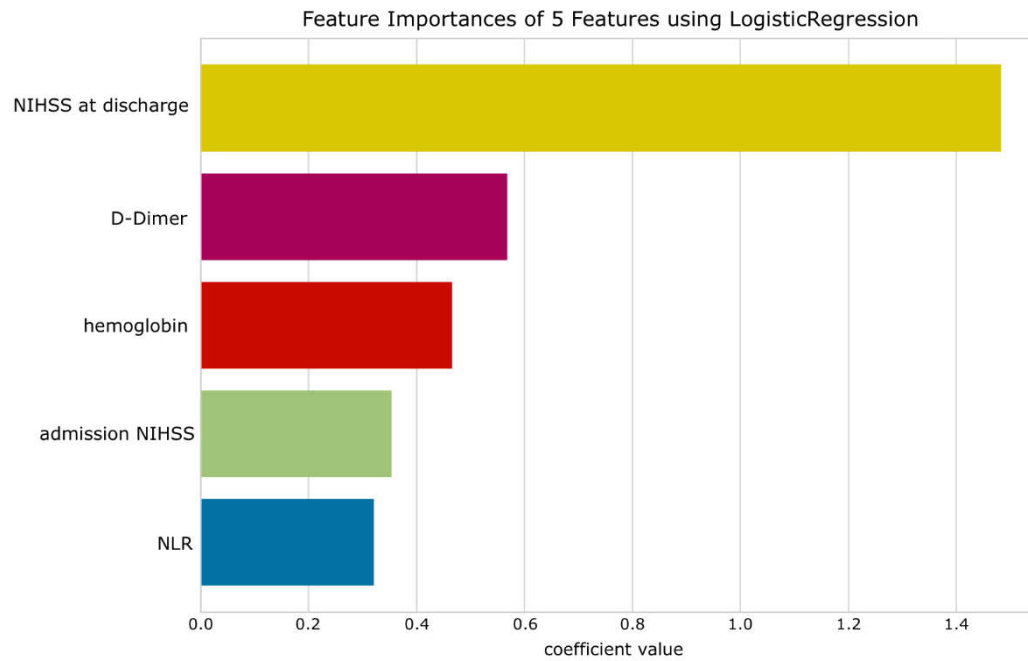

**Supplementary Figure 6.** The importance of CFs post-MT for 90-day prognosis analyzed by logistic regression.

**Supplementary Table 1.** Coefficients of RFs analyzed by the LASSO algorithm

| Name of RFs                                      | Coefficient |
|--------------------------------------------------|-------------|
| wavelet-LLH_firstorder_Skewness                  | -0.029      |
| wavelet-LLH_glcm_ClusterShade                    | -0.061      |
| wavelet-LHH_glrlm_GrayLevelVariance              | 0.061       |
| wavelet-LHH_glrlm_LowGrayLevelRunEmphasis        | -0.093      |
| wavelet-HHL_firstorder_Skewness                  | -0.121      |
| wavelet-HHL_firstorder_Minimum                   | -0.055      |
| wavelet-HHH_glszm_SmallAreaHighGrayLevelEmphasis | 0.041       |

wavelet: wavelet transform; LLH, LHH, HHL and HHH: subbands of the wavelet transform; firstorder: first-order feature; glcm: gray-level co-occurrence matrix; glrlm: gray-level run-length matrix; glszm: gray-level size-zone matrix.

**Supplementary Table 2.** Intra-observer and inter-observer reproducibility of simple imaging features

|                                       | Intraclass Correlation Coefficient (95% CI) |                    |
|---------------------------------------|---------------------------------------------|--------------------|
|                                       | Intra-observer                              | Inter-observer     |
| The density of MCA affected side      | 0.924(0.737-0.967)                          | 0.837(0.767-0.886) |
| The density of MCA contralateral side | 0.903(0.715-0.955)                          | 0.858(0.745-0.915) |
| Difference value of bilateral MCA     | 0.931(0.899-0.953)                          | 0.924(0.889-0.948) |
| Density ratio of bilateral MCA        | 0.913(0.874-0.940)                          | 0.888(0.836-0.924) |
| Length of clot                        | 0.819(0.739-0.876)                          | 0.923(0.887-0.948) |

CI: Confidence interval; MCA: middle cerebral artery

**Supplementary Table 3.** RQS score: Our experiment met criteria 1(+1), 2(+1), 5(+3), 6(+1), 9(+1), 10(+1), 12(+2), 14(+2); therefore, the total score was 12.

| Criteria |                                                                                                                                                                                                 | Points                                                                       |
|----------|-------------------------------------------------------------------------------------------------------------------------------------------------------------------------------------------------|------------------------------------------------------------------------------|
| 1        | <b>Image protocol quality-well-documented image protocols (for example, contrast, slice thickness, energy, etc.) and/or usage of public image protocols allow reproducibility/replicability</b> | <b>+1 (if protocols are well-documented) +1 (if public protocol is used)</b> |

|   |                                                                                                                                                                                                                                                                |                                                                                   |
|---|----------------------------------------------------------------------------------------------------------------------------------------------------------------------------------------------------------------------------------------------------------------|-----------------------------------------------------------------------------------|
| 2 | <b>Multiple segmentations-possible actions are: segmentation by different physicians/algorithms/software, perturbing segmentations by (random) noise, segmentation at different breathing cycles. Analyse feature robustness to segmentation variabilities</b> | +1                                                                                |
| 3 | Phantom study on all scanners-detect inter-scanner differences and vendor-dependent features. Analyse feature robustness to these sources of variability                                                                                                       | +1                                                                                |
| 4 | Imaging at multiple time points-collect images of individuals at additional time points. Analyse feature robustness to temporal variabilities (for example, organ movement, organ expansion/ shrinkage)                                                        | +1                                                                                |
| 5 | <b>Feature reduction or adjustment for multiple testing-decreases the risk of overfitting. Overfitting is inevitable if the number of features exceeds the number of samples. Consider feature robustness when selecting features</b>                          | <b>-3(if neither measure is implemented) +3(if either measure is implemented)</b> |
| 6 | <b>Multivariable analysis with non radiomics features (for example, EGFR mutation) is expected to provide a more holistic model. Permits correlating/inferencing between radiomics and non radiomics features</b>                                              | +1                                                                                |
| 7 | Detect and discuss biological correlates-demonstration of phenotypic differences (possibly associated with underlying gene-protein expression patterns) deepens understanding of radiomics and biology                                                         | +1                                                                                |
| 8 | Cut-off analyses-determine risk groups by either the median, a previously published cut-off or report a continuous risk variable Reduces the risk of reporting overly optimistic results                                                                       | +1                                                                                |

|    |                                                                                                                                                                                                                                                                                                           |                                                                                                                                                                                                                                                                                                                                                                                   |
|----|-----------------------------------------------------------------------------------------------------------------------------------------------------------------------------------------------------------------------------------------------------------------------------------------------------------|-----------------------------------------------------------------------------------------------------------------------------------------------------------------------------------------------------------------------------------------------------------------------------------------------------------------------------------------------------------------------------------|
| 9  | <p><b>Discrimination statistics-report discrimination statistics (for example, C-statistic, ROC curve, AUC) and their statistical significance (for example, p-values, confidence intervals). One can also apply resampling method (for example, bootstrapping, cross-validation)</b></p>                 | <p><b>+1 (if a discrimination statistic and its statistical significance are reported) +1(if a resampling method technique is also applied)</b></p>                                                                                                                                                                                                                               |
| 10 | <p><b>Calibration statistics-report calibration statistics (for example, Calibration-in-the-large/slope, calibration plots) and their statistical significance (for example, P-values, confidence intervals). One can also apply resampling method (for example, bootstrapping, cross-validation)</b></p> | <p><b>+1 (if a calibration statistic and its statistical significance are reported) +1 (if a resampling method technique is also applied)</b></p>                                                                                                                                                                                                                                 |
| 11 | <p>Prospective study registered in a trial database-provides the highest level of evidence supporting the clinical validity and usefulness of the radiomics biomarker</p>                                                                                                                                 | <p>+7 (for prospective validation of a radiomics signature in an appropriate trial)</p>                                                                                                                                                                                                                                                                                           |
| 12 | <p><b>Validation-the validation is performed without retraining and without adaptation of the cut-off value, provides crucial information with regard to credible clinical performance</b></p>                                                                                                            | <p><b>-5(if validation is missing) +2(if validation is based on a dataset from the same institute) +3(if validation is based on a dataset from another institute) +4(if validation is based on two datasets from two distinct institutes) +4(if the study validate is a previously published signature) +5(if validation is based on three or more datasets from distinct</b></p> |

|                               |                                                                                                                                                                                                                                          |                                                                                                                                                                                                                                                             |
|-------------------------------|------------------------------------------------------------------------------------------------------------------------------------------------------------------------------------------------------------------------------------------|-------------------------------------------------------------------------------------------------------------------------------------------------------------------------------------------------------------------------------------------------------------|
|                               |                                                                                                                                                                                                                                          | <b>institutes)</b><br><br><b>*Datasets should be of comparable size and should have at least 10 events per model feature</b>                                                                                                                                |
| 13                            | Comparison to 'gold standard' -assess the extent to which the model agrees with/is superior to the current 'gold standard' method (for example, TNM-staging for survival prediction). This comparison shows the added value of radiomics | +2                                                                                                                                                                                                                                                          |
| 14                            | <b>Potential clinical utility-report on the current and potential application of the model in a clinical setting (for example, decision curve analysis).</b>                                                                             | +2                                                                                                                                                                                                                                                          |
| 15                            | Cost-effectiveness analysis-report on the cost-effectiveness of the clinical application (for example, QALYs generated)                                                                                                                  | +1                                                                                                                                                                                                                                                          |
| 16                            | Open science and data-make code and data publicly available. Open science facilitates knowledge transfer and reproducibility of the study                                                                                                | 1(if scans are open source) +1(if region of interest segmentations are open source) +1(if code is open source) +1(if radiomics features are calculated on a set of representative ROIs and the calculated features and representative ROIs are open source) |
| <b>Total points (36=100%)</b> |                                                                                                                                                                                                                                          |                                                                                                                                                                                                                                                             |
